# Supplementary material for: Cloud–radiation interactions amplify ozone pollution in a warming climate
Source: Copernicus journal article supplement (doi:10.5194/acp-25-12483-2025), 2025-10-09
Supplement: Supplementary file 1 [file acp-25-12483-2025-supplement.pdf]

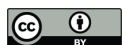

*Supplement of*

## **Cloud–radiation interactions amplify ozone pollution in a warming climate**

**Shuyu Zhao et al.**

*Correspondence to:* Tian Feng ([fengtian@nbu.edu.cn](mailto:fengtian@nbu.edu.cn)) and Minghu Ding ([dingmh@cma.gov.cn](mailto:dingmh@cma.gov.cn))

The copyright of individual parts of the supplement might differ from the article licence.

**Table S1** Model configurations. A detailed model information on the simulation domain, period, resolution, meteorological and chemical schemes, initial and boundary fields, and emission inventory. The spin-up time is 2 days.

| <b>Domain</b>                          |                                                                                                                                                                      |
|----------------------------------------|----------------------------------------------------------------------------------------------------------------------------------------------------------------------|
| Period of baseline simulation          | July, 2022                                                                                                                                                           |
| Size                                   | 200 grids $\times$ 200 grids                                                                                                                                         |
| Center                                 | 120.0°E, 31.2°N                                                                                                                                                      |
| Horizontal resolution                  | 6 km $\times$ 6 km                                                                                                                                                   |
| Vertical resolution                    | A flexible vertical interval, 35 vertical levels, spacing ranging from 50 m near the surface, 500 m at 2.5 km above the ground level, and more than 1 km above 14 km |
| <b>Meteorology</b>                     |                                                                                                                                                                      |
| Microphysics scheme                    | WSM 6-class graupel microphysics scheme (Hong & Lim, 2006)                                                                                                           |
| Boundary layer scheme                  | Mellor-Yamada-Janji planetary boundary layer scheme (Janjić, 2002)                                                                                                   |
| Surface layer scheme                   | Monin-Obukhov surface layer scheme (Janjić, 2002)                                                                                                                    |
| Land-surface scheme                    | Noah land-surface model (Chen & Dudhia, 2001)                                                                                                                        |
| Longwave radiation scheme              | Goddard (Dudhia, 1989)                                                                                                                                               |
| Shortwave radiation scheme             | Goddard (Dudhia, 1989)                                                                                                                                               |
| Dry deposition                         | Wesely (1989)                                                                                                                                                        |
| Wet deposition                         | CMAQ by the U.S. EPA (Byun & Ching, 1999)                                                                                                                            |
| <b>Chemistry</b>                       |                                                                                                                                                                      |
| Gas phase chemistry                    | SAPRC99 chemical mechanism (Binkowski and Roselle, 2003)                                                                                                             |
| Inorganic aerosols                     | ISORROPIA version 1.7 (Nenes et al., 1998), SO <sub>2</sub> heterogeneous reaction on aerosol surface (G. Li et al., 2017)                                           |
| Secondary organic aerosol              | Non-traditional VBS parametrization (G. Li, Zavala, et al., 2011), NO <sub>2</sub> heterogeneous reaction (Li et al., 2010)                                          |
| Photolysis rates                       | FTUV radiation transfer model (Tie et al., 2003; G. Li, Bei, et al., 2011)                                                                                           |
| <b>Initial and boundary conditions</b> |                                                                                                                                                                      |
| Meteorological                         | NCEP FNL 6-h 1° $\times$ 1°                                                                                                                                          |
| Chemical                               | CAM-chem 6-h outputs                                                                                                                                                 |
| <b>Emission inventory</b>              |                                                                                                                                                                      |
| Anthropogenic                          | MEIC (M. Li et al., 2017)                                                                                                                                            |
| Biogenic                               | MEGAN (Guenther et al., 2006)                                                                                                                                        |

22 **Table S2** Climate models and variables. A total of 41 models from CMIP6 are used,  
 23 and each model name and variables therein are listed.

| No. | Model name       | T_max | TCC | SSRD |
|-----|------------------|-------|-----|------|
| 1   | ACCESS-CM2       | √     | √   | √    |
| 2   | AWI-CM-1-1-MR    | √     | √   | √    |
| 3   | BCC-CSM2-MR      | √     | √   | √    |
| 4   | CAMS-CSM1-0      | √     | √   | √    |
| 5   | CanESM5          | √     | √   | √    |
| 6   | CanESM5-CanOE    | ×     | √   | √    |
| 7   | CESM2            | √     | √   | √    |
| 8   | CESM2-WACCM      | √     | ×   | ×    |
| 9   | CIESM            | ×     | ×   | √    |
| 10  | CMCC-CM2-SR5     | ×     | √   | √    |
| 11  | CMCC-ESM2        | √     | √   | √    |
| 12  | CNRM-CM6-1       | √     | √   | √    |
| 13  | CNRM-CM6-1-HR    | √     | √   | √    |
| 14  | CNRM-ESM2-1      | √     | √   | √    |
| 15  | E3SM-1-1         | ×     | √   | √    |
| 16  | EC-Earth3        | √     | √   | ×    |
| 17  | EC-Earth3-CC     | √     | √   | √    |
| 18  | EC-Earth3-Veg    | √     | √   | ×    |
| 19  | EC-Earth3-Veg-LR | √     | √   | √    |
| 20  | FGOALS-f3-L      | ×     | ×   | √    |
| 21  | FGOALS-g3        | √     | √   | √    |
| 22  | FIO-ESM-2-0      | ×     | ×   | √    |
| 23  | GFDL-ESM4        | √     | √   | √    |
| 24  | GISS-E2-1-G      | ×     | √   | √    |
| 25  | HadGEM3-GC31-LL  | ×     | √   | √    |
| 26  | HadGEM3-GC31-MM  | ×     | √   | √    |
| 27  | IITM-ESM         | ×     | √   | √    |

|    |               |   |   |   |
|----|---------------|---|---|---|
| 28 | INM-CM4-8     | √ | √ | √ |
| 29 | INM-CM5-0     | √ | √ | √ |
| 30 | IPSL-CM6A-LR  | √ | √ | √ |
| 31 | KACE-1-0-G    | √ | √ | √ |
| 32 | KIOST-ESM     | √ | √ | √ |
| 33 | MIROC6        | √ | √ | √ |
| 34 | MIROC-ES2L    | √ | √ | √ |
| 35 | MPI-ESM1-2-LR | √ | √ | √ |
| 36 | MRI-ESM2-0    | √ | √ | √ |
| 37 | NESM3         | √ | √ | √ |
| 38 | NorESM2-LM    | √ | √ | √ |
| 39 | NorESM2-MM    | √ | √ | √ |
| 40 | UKESM1-0-LL   | √ | √ | √ |
| 41 | TaiESM1       | × | √ | √ |

24 Note: The number of models for projecting T<sub>max</sub>, TCC, and SSRD varies significantly by the SSP,  
 25 of which the number of models is the fewest under SSP1-1.9, with 12 models for T<sub>max</sub>, 9 models  
 26 for TCC, and 10 models for SSRD. Correspondingly, under SSP2-4.5, the number of models is 15,  
 27 31 and 33, respectively. Under SSP5-8.5, the number of models is 24, 34 and 37, respectively. “√”  
 28 represents the variable is projected in the model, while “×” represents the variable is not projected.  
 29

30

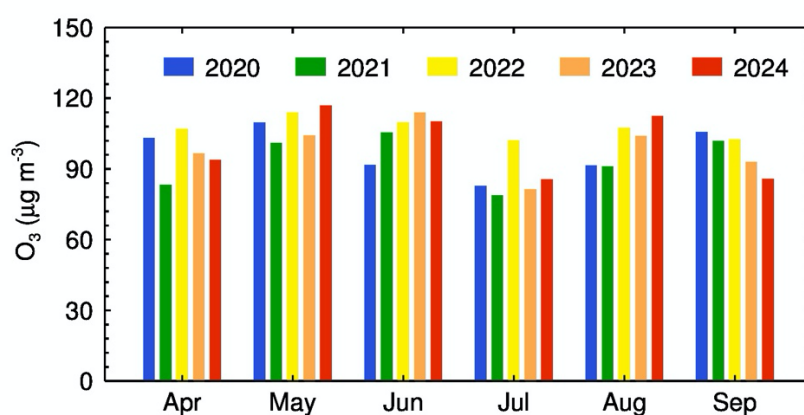

31

32 **Figure S1** Warm-season O<sub>3</sub> variations. Interannual variation in monthly mean daytime

33 (07:00-18:00, BJT) O<sub>3</sub> concentration from April to September during 2020-2024.

34 Interannual variation in mean daytime O<sub>3</sub> concentration in July is highly consistent with

35 the interannual variation in warm-season mean O<sub>3</sub> concentration, with the maximum in

36 2022.

37

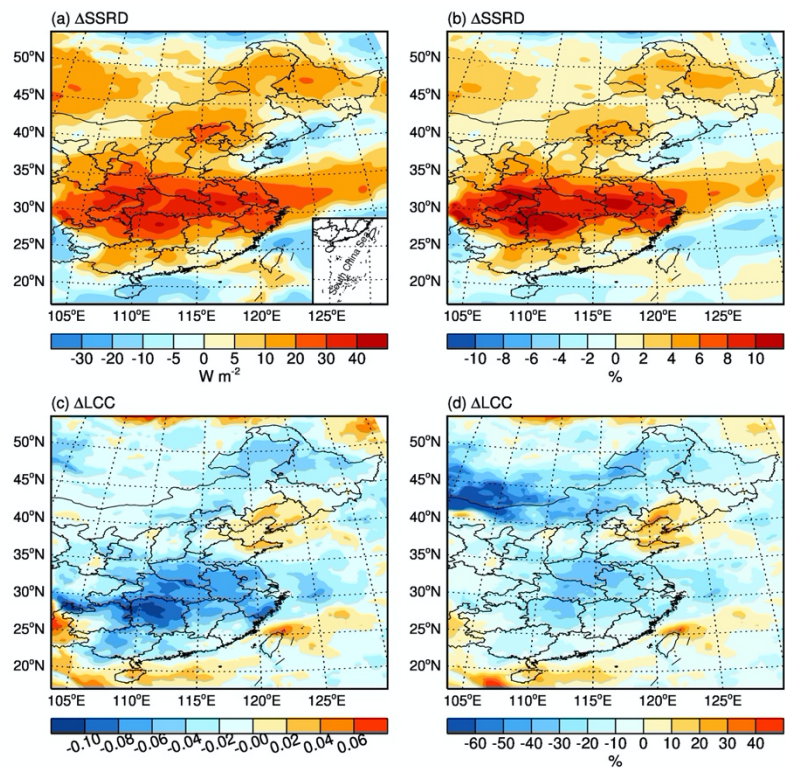

39

40 **Figure S2** Observed anomaly in solar radiation for O<sub>3</sub> formation. (a) SSRD anomaly  
41 during the warm season of 2022 relative to the past decade (2014-2024). (b) Same as  
42 (a), but for the percentage change in SSRD. (c) LCC anomaly. (d) Same as (c), but for  
43 the relative percentage change in LCC. During the warm season of 2022, more SSRD  
44 and less LCC are observed in most of China, particularly in the region between 25°N  
45 and 35°N, where the YRD is located, with an anomalously more SSRD and less LCC.  
46 This is highly favorable for O<sub>3</sub> formation.

47

50 **Figure S3** Observed and simulated meteorology for model performance. Observations  
51 data on T2m, RH, WS, and WD at four weather stations are from four international  
52 airports. (a) Lukou in Nanjing, Jiangsu. (b) Luogang in Hefei, Anhui. (c) Xiaoshan in  
53 Hangzhou, Zhejiang. (d) Hongqiao in Shanghai. The hourly simulations (blue curves)  
54 of four meteorological parameters are generally in good agreements with observations  
55 (black dots) at four airport weather stations in the YRD in July 2022. The MBs, RMSEs,  
56 and IOAs are shown in the margin.

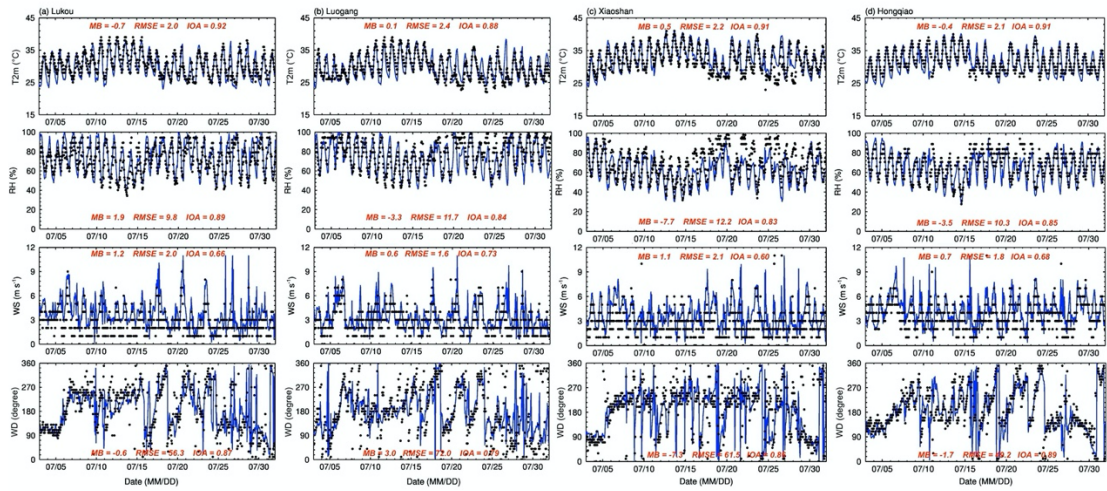

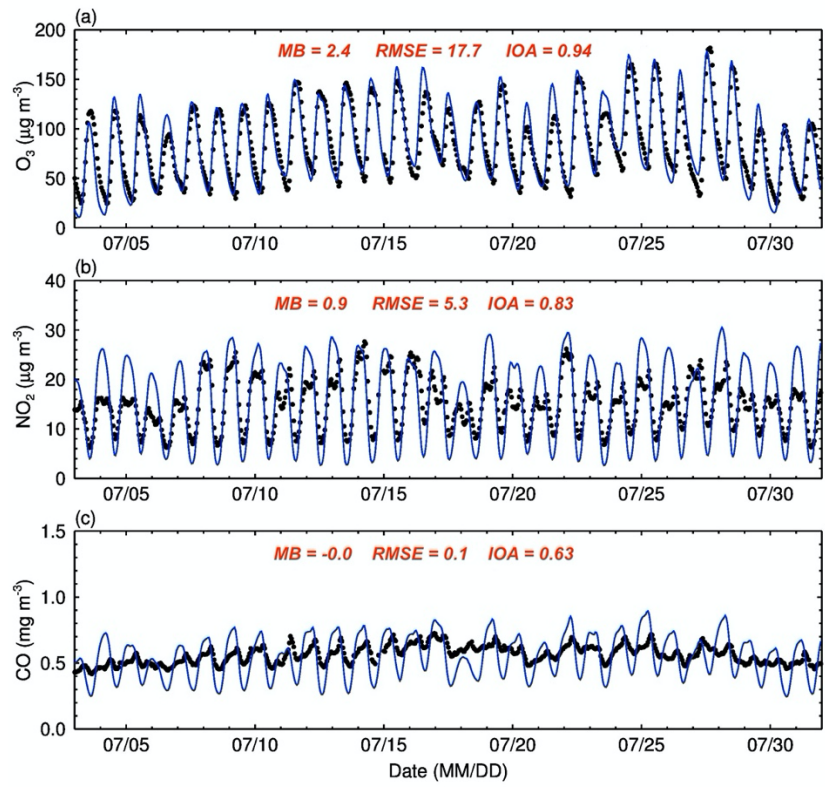

**Figure S4** Model validation for pollutants. Comparison between observed (blue curves) and simulated (black dots) mass concentrations of pollutants. The model well reproduces temporal variations in O<sub>3</sub>, NO<sub>2</sub>, and CO in the YRD in July 2022. The MBs, RMSEs, and IOAs are shown in the top margin.

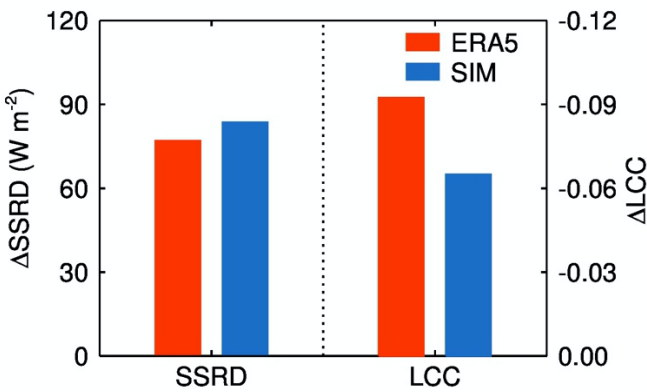

66

67 **Figure S5** The simulated and observed interannual differences in SSRD and LCC.  
68 Differences in SSRD and LCC in July between 2021 and 2022 calculated by the model  
69 (the blue histograms) are highly closed to ECMWF ERA5 reanalysis data (the red  
70 histograms), showing a better performance of the model on the solar radiation change.

71

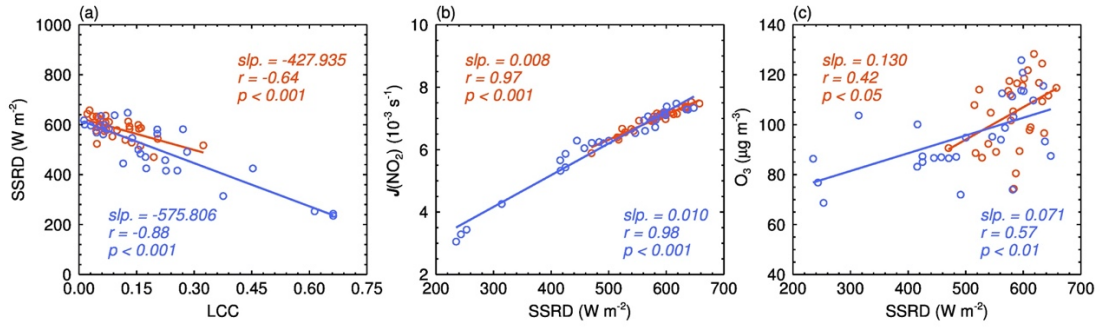

73

74 **Figure S6** Simulated linkage between  $\text{O}_3$  and LCC through SSRD. (a) A significantly  
 75 negative correlation between SSRD and LCC, with confidence levels exceeding 99.9%.  
 76 Consistent with observations in Figure 2a, SSRD is strongly modulated by the LCC.  
 77 The more the LCC, the more SSRD is weakened. (b) The photolysis rates strongly  
 78 depend on SSRD, and are mostly controlled by the SSRD, with the correlation  
 79 coefficient highly close to 1.0, i.e.,  $r = 0.98$  (2021) and  $r = 0.97$  (2022). For every 100  
 80  $\text{W m}^{-2}$  increase in SSRD, the photolysis rate  $J(\text{NO}_2)$  rises by  $1.0 \times 10^{-3} \text{ s}^{-1}$ . (c)  
 81 Relationship between  $\text{O}_3$  and SSRD,  $\text{O}_3$  concentration is significantly positively  
 82 correlated with SSRD, with confidence levels exceeding 95%. The colored circles  
 83 represent the simulations for July 2021 (blue) and July 2022 (red), respectively. The  
 84 colored lines represent the linear fits corresponding to the circles of the same color.

85

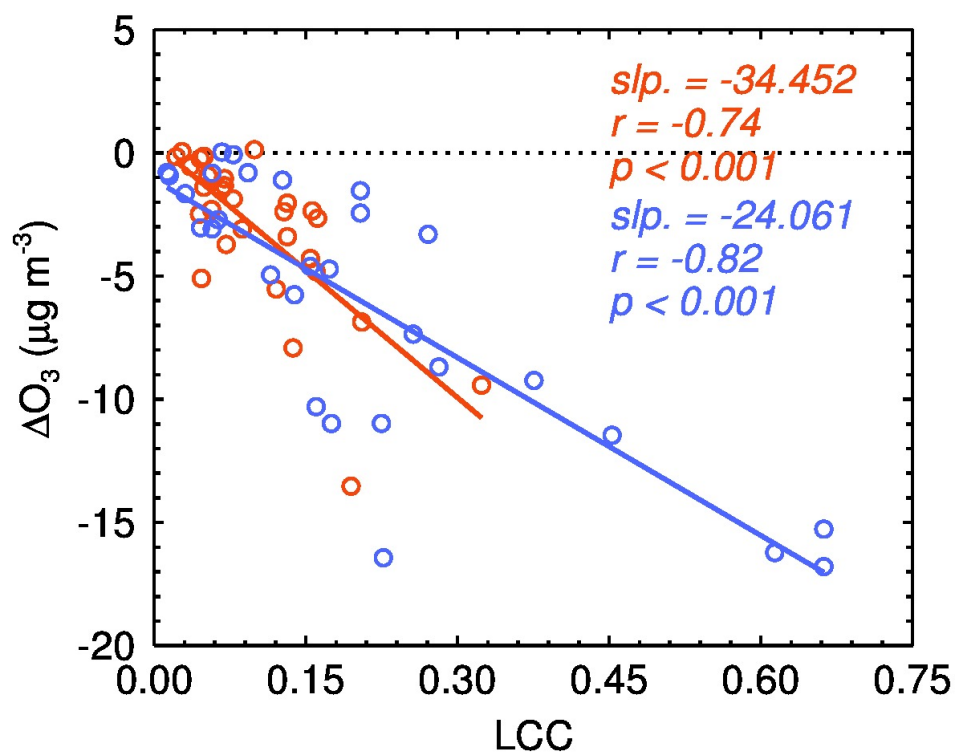

87

88 **Figure S7** Same as Figure S6, but for relationship between  $\Delta O_3$  due to CRI and LCC.

89 The  $\Delta O_3$  is significantly negatively correlated with LCC, with confidence levels

90 exceeding 99.9%. The impact of LCC on  $\Delta O_3$  through CRI mechanism is more

91 significant in the initial stage of clouds occurrence.

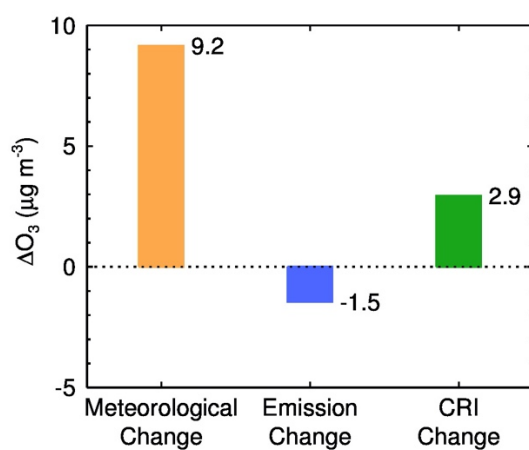

93

94 **Figure S8** Contributions of interannual variability in various influence factors to  $\Delta O_3$ .

95 These factors include meteorological conditions, precursor emissions, and CRI. The

96 changes in meteorological conditions also refer specifically to variabilities in LCC and

97 SSRD.
